# Supplementary material for: Accurate and precise real-time RT-PCR assays for the identification of astrovirus associated encephalitis in cattle
Source: PubMed Central journal article supplement (PMC6003944; doi:10.1038/s41598-018-27533-8), 2018-06-15
Supplement: 41598_2018_27533_MOESM1_ESM.pdf [file 41598_2018_27533_MOESM1_ESM.pdf]

Supplementary information

Accurate and precise real-time RT-PCR assays for the identification of astrovirus associated encephalitis in cattle

Ramona Lüthi<sup>1</sup>, Céline L. Boujon<sup>1,2</sup>, Ronja Kauer<sup>1</sup>, Michel C. Koch<sup>1,2</sup>, Ilias G. Bouzalas<sup>1#</sup>, and Torsten Seuberlich<sup>1</sup>

<sup>1</sup>NeuroCenter, Division of Neurological Sciences, Vetsuisse Faculty, University of Bern, Bern, Switzerland

<sup>2</sup>Graduate School for Cellular and Biomedical Sciences, University of Bern, Bern, Switzerland

#Current address: Veterinary Research Institute, Hellenic Agricultural Organization-DEMETER, Campus of Thessaloniki, Thessaloniki, Greece



**Supplementary Figure 2:** Unprocessed gel picture of Figure 2B. The dashed white box indicates the cropped area.

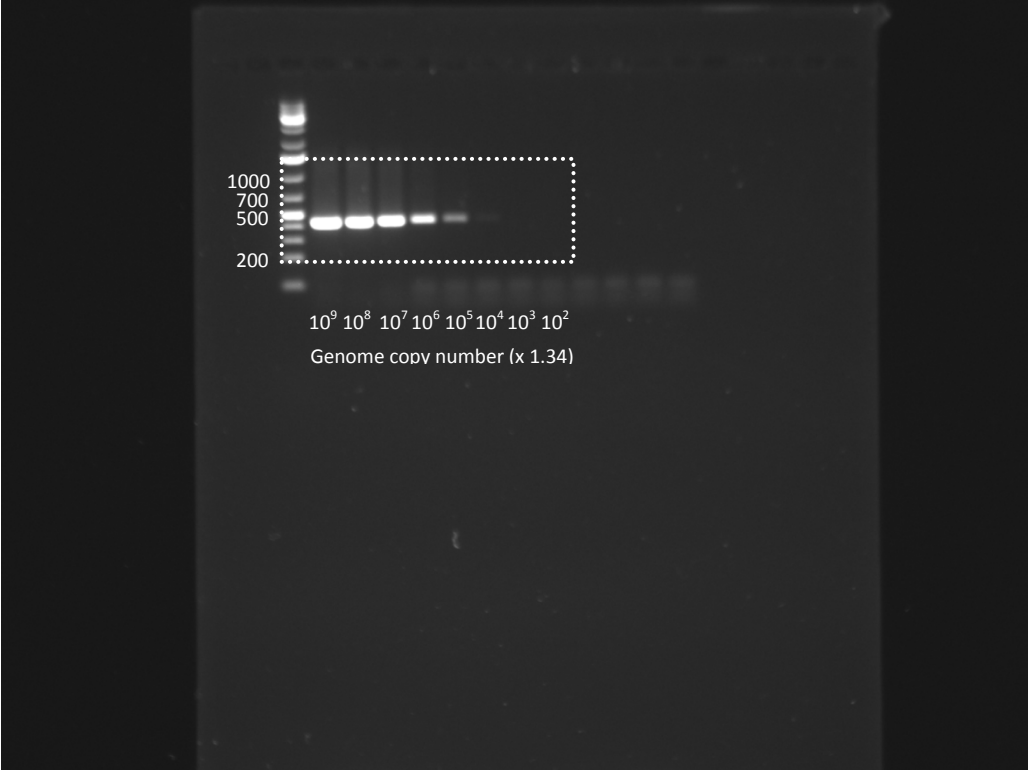

**Supplementary Table 1:** Details on RNA extracts of cattle brain tissues tested positive for viruses other than BoAstV CH13/NeuroS1: BHV-6, Bovine herpesvirus 6; BoPyV-2, Bovine polyomavirus 2; BoRV Ch15, Bovine retrovirus CH15; OvHV-2, Ovine herpesvirus 2; PIV-5, Parainfluenza virus 5; BVD, Bovine viral diarrhea virus.

| Test format | PCR / RT-PCR* |       |         |           |        | NGS | BoAstV CH13/NeuroS1 RT-qPCR [ct] |     |        |        |
|-------------|---------------|-------|---------|-----------|--------|-----|----------------------------------|-----|--------|--------|
|             | Animal ID     | BHV-6 | BoPyV-2 | BoRV CH15 | OvHV-2 |     | PIV-5                            | BVD | CH13-A | CH13-B |
|             | 24250         | +     |         |           |        |     |                                  | nd  | nd     | nd     |
|             | 25018         |       |         | +         |        |     |                                  | nd  | nd     | nd     |
|             | 26324         |       |         |           | +      |     |                                  | nd  | nd     | nd     |
|             | 26731         | +     | +       |           |        | +   |                                  | nd  | nd     | nd     |
|             | 32450         | +     | +       |           |        |     |                                  | nd  | nd     | nd     |
|             | 34510         |       | +       |           |        |     |                                  | nd  | nd     | nd     |
|             | 42268         | +     |         |           |        |     |                                  | nd  | nd     | nd     |
|             | 47243         |       |         |           | +      |     |                                  | nd  | nd     | nd     |
|             | 47417         |       |         | +         |        |     |                                  | nd  | nd     | nd     |
|             | 47422         |       |         |           | +      |     |                                  | nd  | nd     | nd     |
|             | 47476         | +     | -       |           |        |     |                                  | nd  | nd     | 34,4   |
|             | 47681         | +     |         |           |        |     |                                  | nd  | nd     | nd     |
|             | 47791         | +     |         |           |        |     |                                  | nd  | nd     | nd     |
|             | 48304         |       |         |           | +      |     |                                  | nd  | nd     | nd     |
|             | 439           |       |         |           |        | +   |                                  | nd  | nd     | nd     |

+, positive; - negative; nd, not detected; \* result have been published previously by Wüthrich et al. <sup>1</sup> and Truchet et al. <sup>2</sup>

**Supplementary Table 2:** Bovine feces samples tested positive for astrovirus using the pan-astrovirus RT-PCR targeting the viral RNA-dependent RNA polymerase (RdRp) encoded by ORF1b.<sup>3</sup> Amplicons were Sanger sequenced and the resulting sequences were compared with GenBank nucleotide database entries using megablast. Best hits and sequence identities are shown.

| Sample ID | Best megablast hit (accession number)                | Identity [%] |
|-----------|------------------------------------------------------|--------------|
| 16D3810   | Bovine astrovirus strain BAstGX-J27 (KJ476832)       | 87.8         |
| 16D3962   | Yak astrovirus isolate S8 (KM822593)                 | 84.5         |
| 17D43     | Bovine astrovirus B18/HK, complete genome (HQ916313) | 90.0         |
| 17D99     | Bovine astrovirus strain BAstGX-J27 (KJ476832)       | 88.9         |
| 17D824    | Astrovirus deer/CcAstV-2/DNK/2010 (HM447046)         | 86.2         |
| 17D1196   | Bovine astrovirus strain BAstGX-J27 (KJ476832)       | 88.5         |

#### References

- 1 Wuthrich, D. *et al.* Exploring the virome of cattle with non-suppurative encephalitis of unknown etiology by metagenomics. *Virology* **493**, 22-30, doi:10.1016/j.virol.2016.03.009 (2016).
- 2 Truchet, L. *et al.* Neuropathological survey reveals underestimation of the prevalence of neuroinfectious diseases in cattle in Switzerland. *Veterinary microbiology* **208**, 137-145, doi:<http://dx.doi.org/10.1016/j.vetmic.2017.07.027> (2017).
- 3 Mittelholzer, C., Hedlund, K. O., Englund, L., Dietz, H. H. & Svensson, L. Molecular characterization of a novel astrovirus associated with disease in mink. *Journal of general virology* **84**, 3087-3094 (2003).
